# Supplementary material for: A highly specific and sensitive turn-on fluorescence probe for hypochlorite detection and its bioimaging applications
Source: Royal Society of Chemistry journal article supplement (doi:10.1039/c9ra01457h), 2019-01-01
Supplement: c9ra01457h1.pdf [file c9ra01457h1.pdf]

Electronic Supplementary Material (ESM) for Publication:

**A highly specific and sensitive turn-on fluorescence probe for hypochlorite detection and its bioimaging applications**

Lei Jin,<sup>1,2</sup> Xiaoxue Tan,<sup>1</sup> Ling Zhang,<sup>1</sup> Lihui Dai,<sup>1</sup> Liqiang Sheng,<sup>1</sup> Qingming Wang<sup>1,\*</sup>

Fig. S1. <sup>1</sup>H-NMR of probe **EDPC**.

Fig. S2. <sup>13</sup>C-NMR of probe **EDPC**.

Fig. S3. ESI mass spectra of probe **EDPC**.

Fig.S4. CIE diagram of the probe **1b** with ClO<sup>-</sup> ( 4 equiv. ) in Tris-HCl buffer (pH = 7.2, 10 mM, 50% C<sub>2</sub>H<sub>5</sub>OH).

Fig. S5. The fluorescent intensity of **EDPC** (1.0 μM) with NaOCl (10 equiv.) and other various metal ions (10 equiv.) in Tris-HCl buffer (pH = 7.2, 10 mM, 50% C<sub>2</sub>H<sub>5</sub>OH)(λ<sub>ex</sub> =380 nm, slit:3nm/3nm). Inset: Corresponding fluorescent color under UV lamp.

Fig. S6. The fluorescent intensity of **EDPC** (1.0μM) at 475 nm changes upon the addition of various metal ions (10μM) in the presence of ClO<sup>-</sup> (10μM) in Tris-HCl buffer (pH = 7.2, 10 mM, 50% C<sub>2</sub>H<sub>5</sub>OH), λ<sub>ex</sub> = 380 nm, slits: 3nm/3nm.

Fig. S7. The cell viability incubated with probe **EDPC** at various contrations (0, 2, 4, 8, 16 and 32 μM).

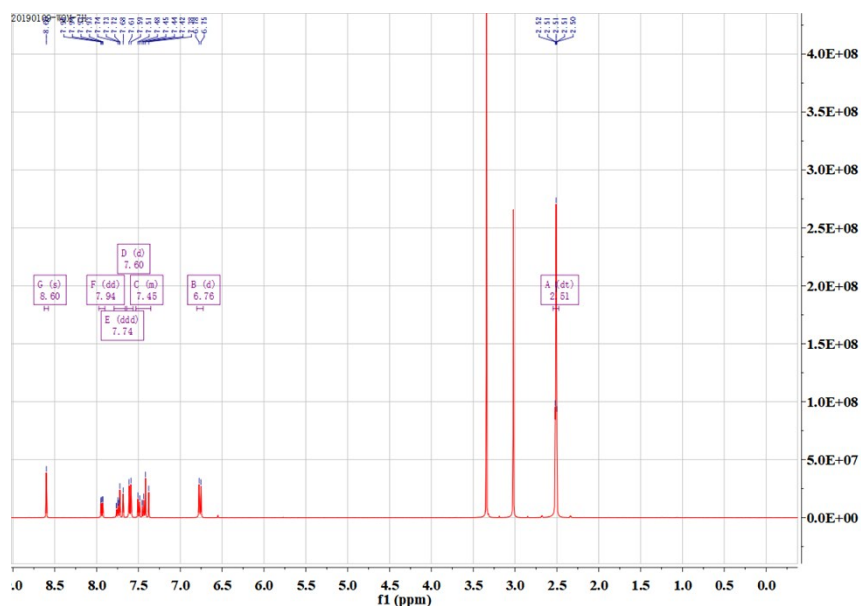

Fig. S1. <sup>1</sup>H-NMR of probe **EDPC**.

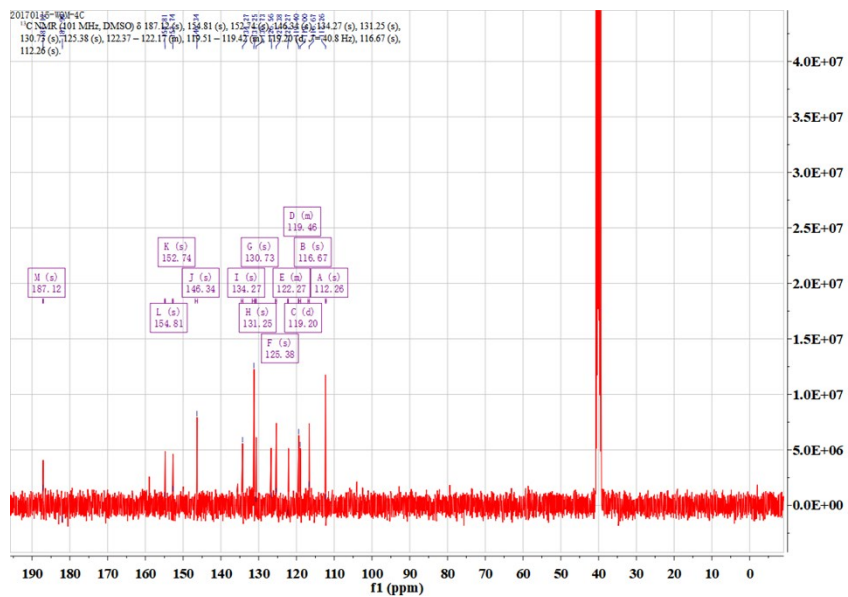

Fig. S2. <sup>13</sup>C-NMR of probe EDPC.

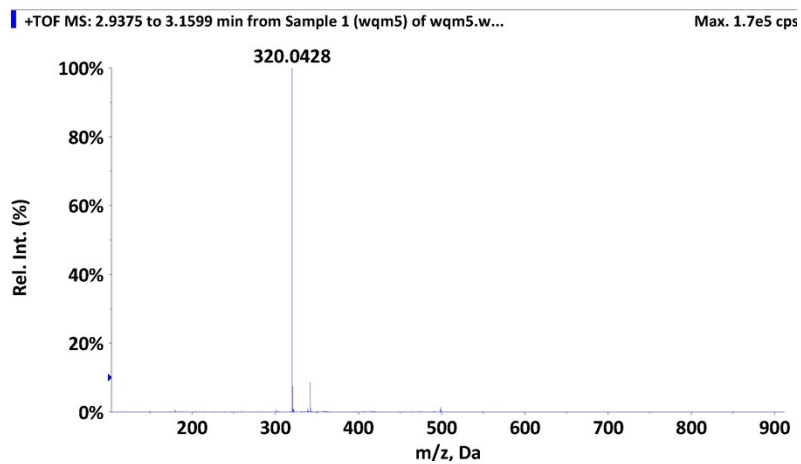

Fig. S3. ESI mass spectra of probe EDPC.

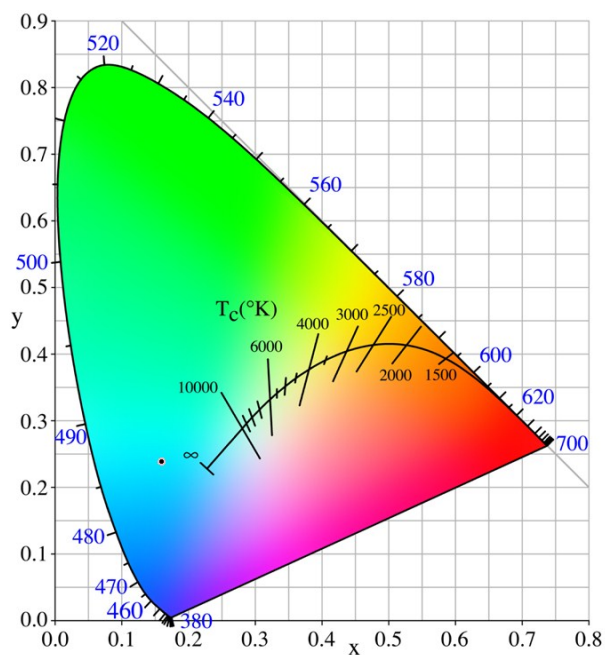

Fig.S4. CIE diagram of the probe **EDPC** with  $\text{ClO}^-$  ( 4 equiv. ) in Tris-HCl buffer ( $\text{pH} = 7.2$ , 10 mM, 50%  $\text{C}_2\text{H}_5\text{OH}$ ).

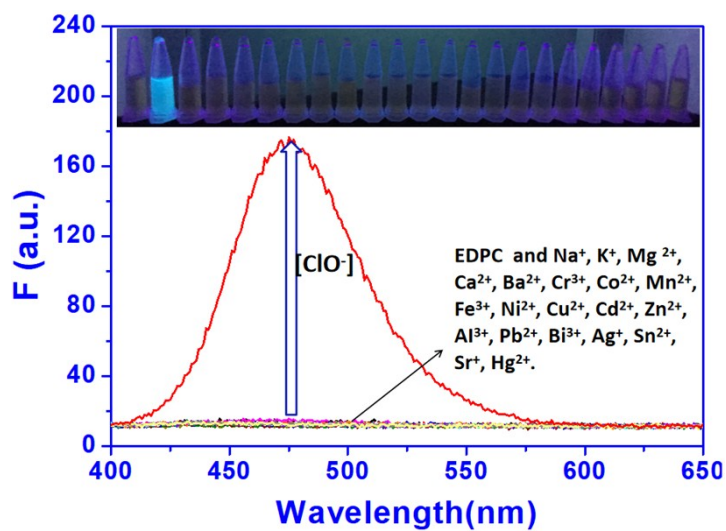

Fig. S5. The fluorescent intensity of **EDPC** ( $1.0 \mu\text{M}$ ) with  $\text{NaOCl}$  (10 equiv.) and other various metal ions (10 equiv.) in Tris-HCl buffer ( $\text{pH} = 7.2$ , 10 mM, 50%  $\text{C}_2\text{H}_5\text{OH}$ ) ( $\lambda_{\text{ex}} = 380 \text{ nm}$ , slit:3nm/3nm). Inset: Corresponding fluorescent color under UV lamp.

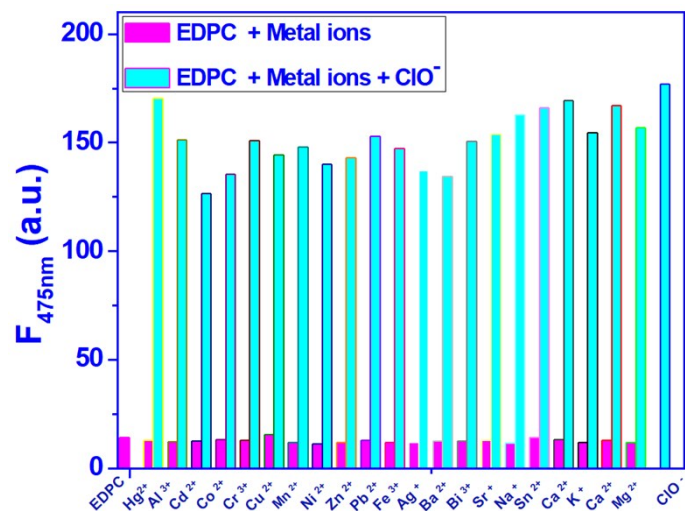

Fig. S6. The fluorescent intensity of **EDPC** ( $1.0\mu\text{M}$ ) at 475 nm changes upon the addition of various metal ions ( $10\mu\text{M}$ ) in the presence of  $\text{ClO}^-$  ( $10\mu\text{M}$ ) in Tris-HCl buffer ( $\text{pH} = 7.2$ ,  $10\text{ mM}$ ,  $50\% \text{ C}_2\text{H}_5\text{OH}$ ),  $\lambda_{\text{ex}} = 380\text{ nm}$ , slits:  $3\text{nm}/3\text{nm}$ .

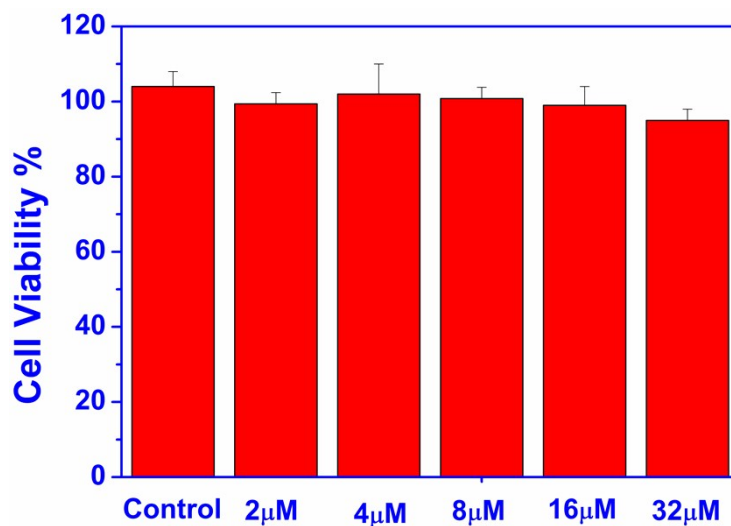

Fig. S7. The cell viability incubated with probe **EDPC** at various concentrations ( $0$ ,  $2$ ,  $4$ ,  $8$ ,  $16$  and  $32\mu\text{M}$ ).
